# Supplementary material
Source: Elsevier journal article supplement (https://www.sciencedirect.com/science/article/pii/S2238785419304764)
Supplement: mmc1 [file S2238785419304764:mmc1.doc]

**Supplementary Material**

**Phytic acid/silica organic-inorganic hybrid sol system: a novel and durable flame retardant approach for wool fabric**

Xian-Wei Cheng, Jin-Ping Guan, Xu-Hong Yang*, Ren-Cheng Tang*, Fan Yao

National Engineering Laboratory for Modern Silk, College of Textile and Clothing Engineering, Soochow University, 199 Renai Road, Suzhou 215123, China

* Corresponding author:

E-mail: yangxuhong@suda.edu.cn; tangrencheng@suda.edu.cn

**Table S1** Whiteness index, bending length and flexural rigidity of the wool fabrics.

| Sample | Whiteness index | Tensile strength  (N) | Bending length  (mm) | Flexural rigidity  (mN cm) |
| --- | --- | --- | --- | --- |
| Control | 79.8 ± 0.1 | 241.6 ± 7.9 | 16.4 ± 0.4 | 0.910 ± 0.063 |
| Wool-3 | 70.2 ± 0.4 | 250.0 ± 5.6 | 17.5 ± 0.3 | 1.066 ± 0.046 |

**Table S2** TG data of the wool fabrics in air.

| Sample | *T50%* a  (oC) | Weight at  150 oC (%) | Weight at  425 oC (%) | Weight at  650 oC (%) |
| --- | --- | --- | --- | --- |
| Control | 393.7 | 92.2 | 44.6 | 0.2 |
| Wool-1 | 437.1 | 94.0 | 51.8 | 10.4 |
| Wool-2 | 461.7 | 94.0 | 54.8 | 13.9 |
| Wool-3 (Experimental) | 493.5 | 94.5 | 57.8 | 25.7 |
| Wool-3 (Calculated) | 421.3 | 91.5 | 49.5 | 11.2 |

a *T*50% denotes the temperature corresponding to a weight loss of 50%.


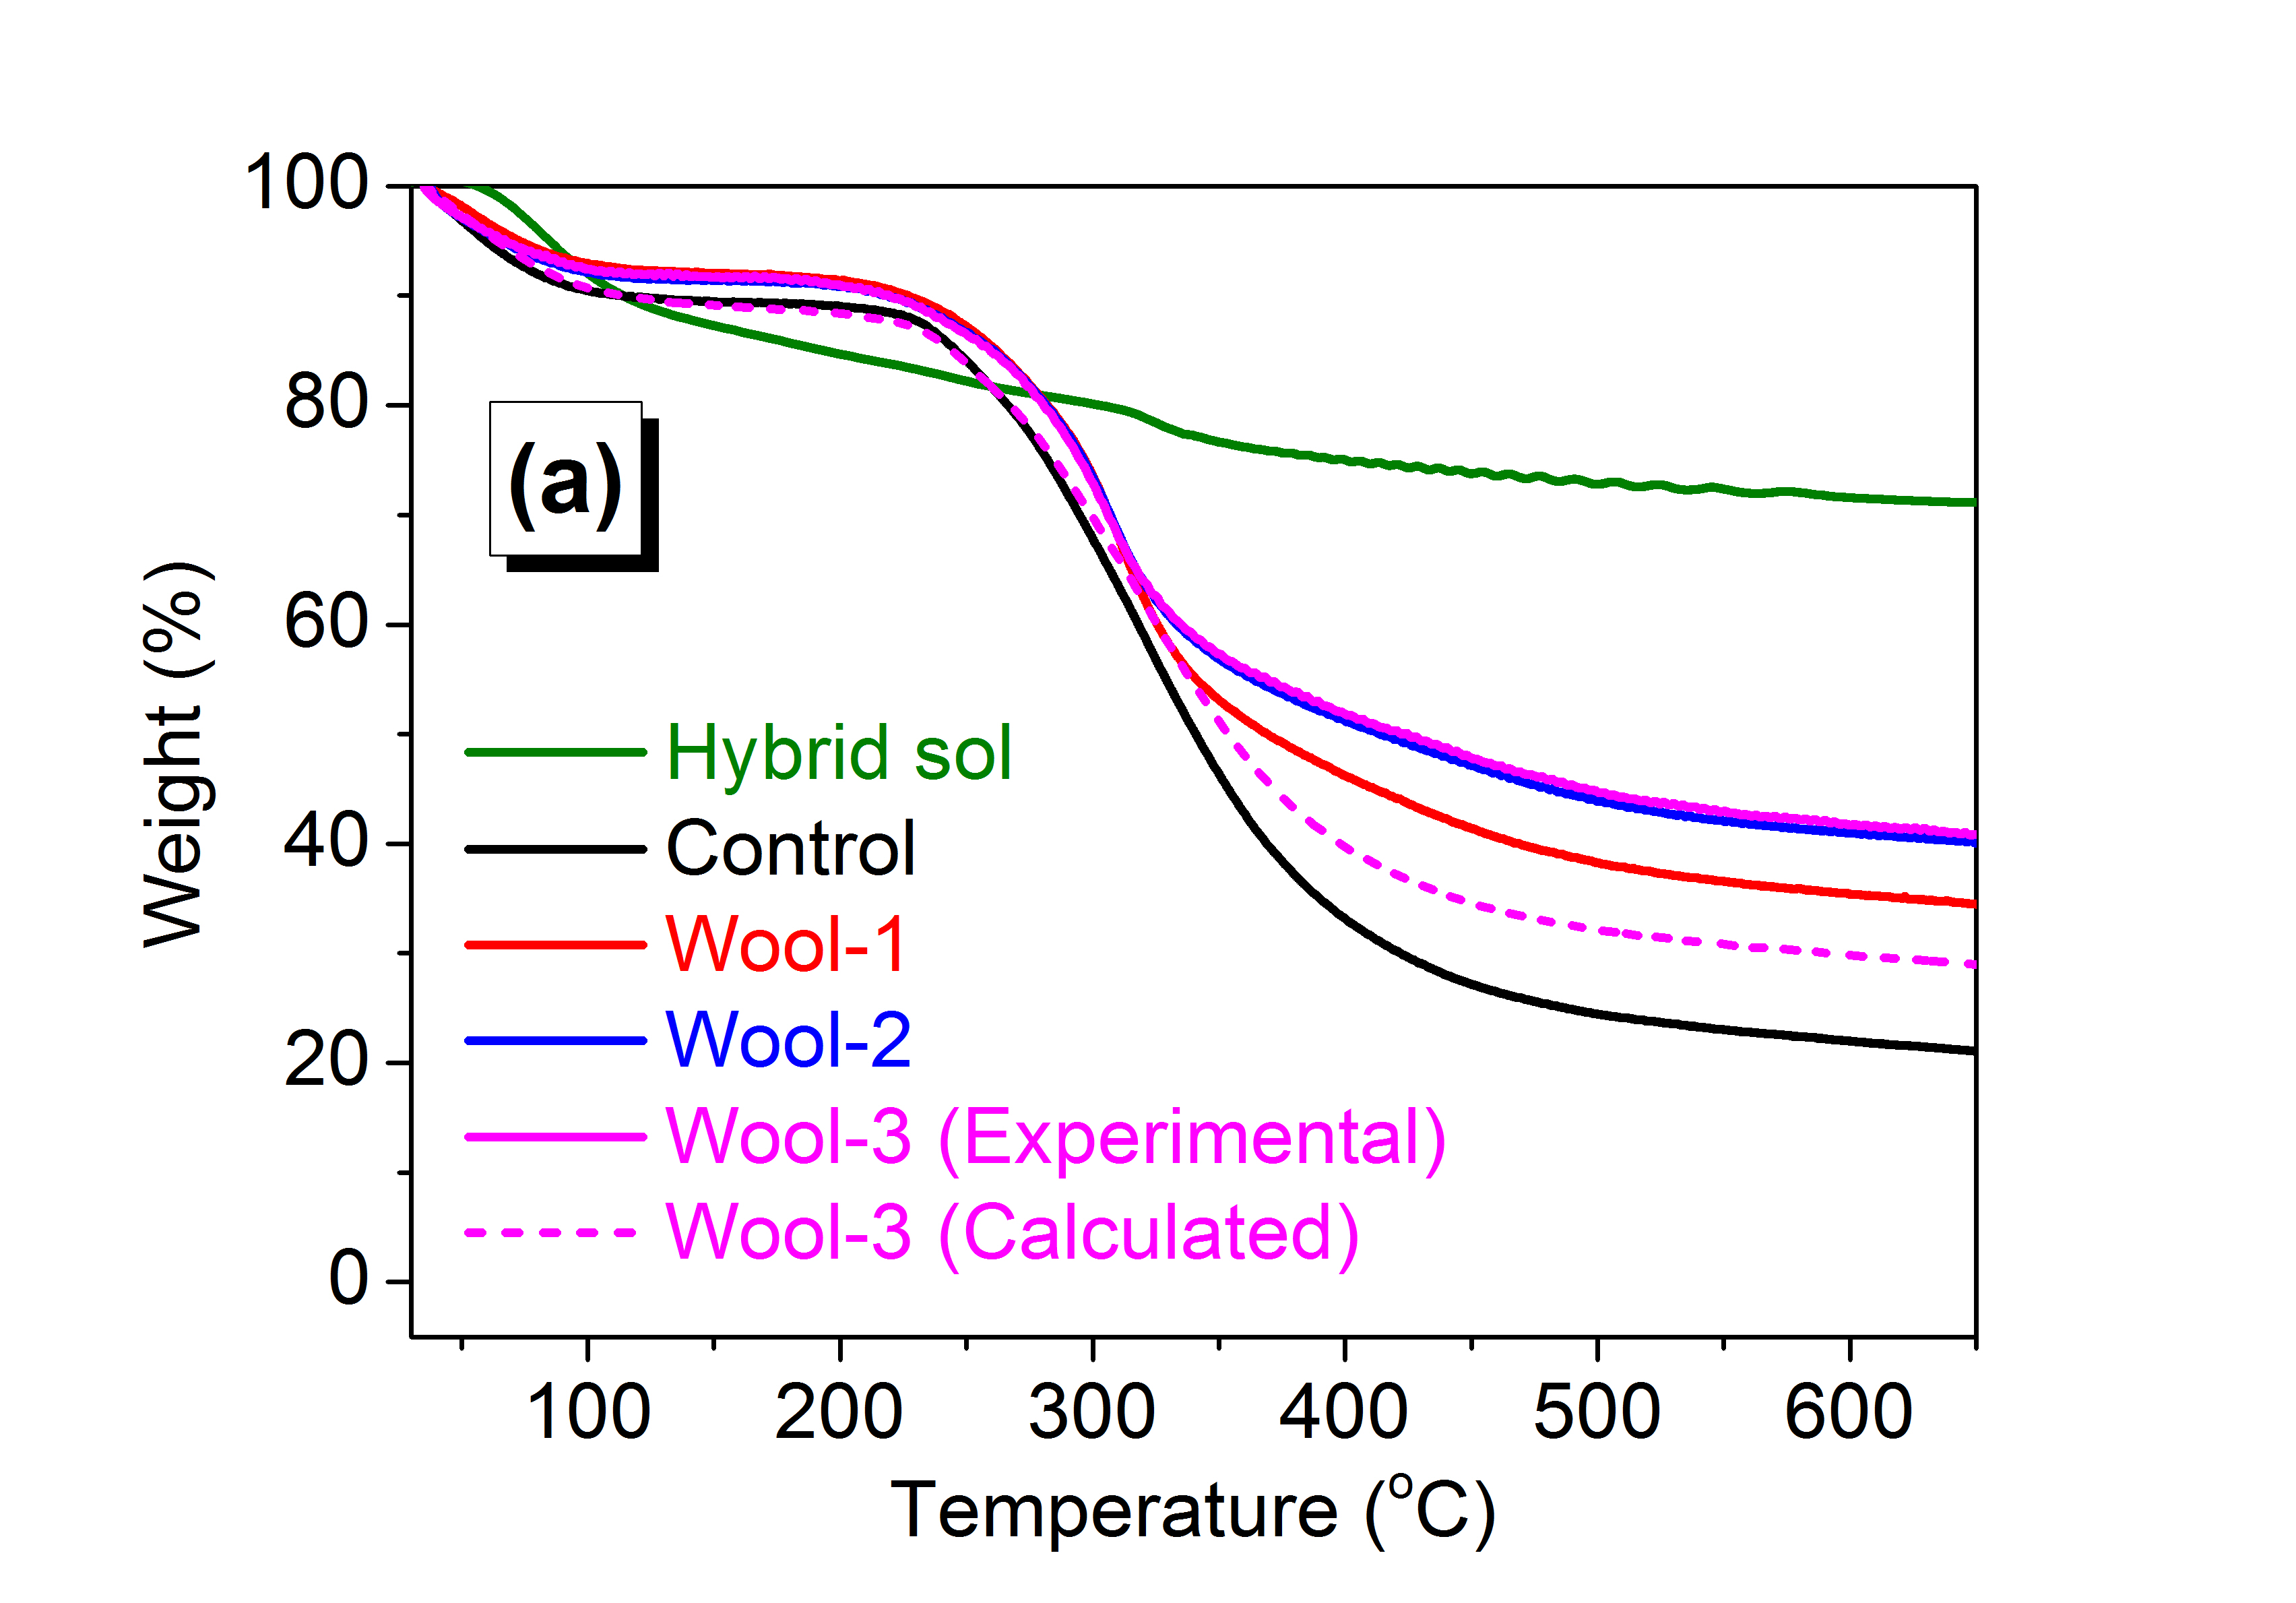

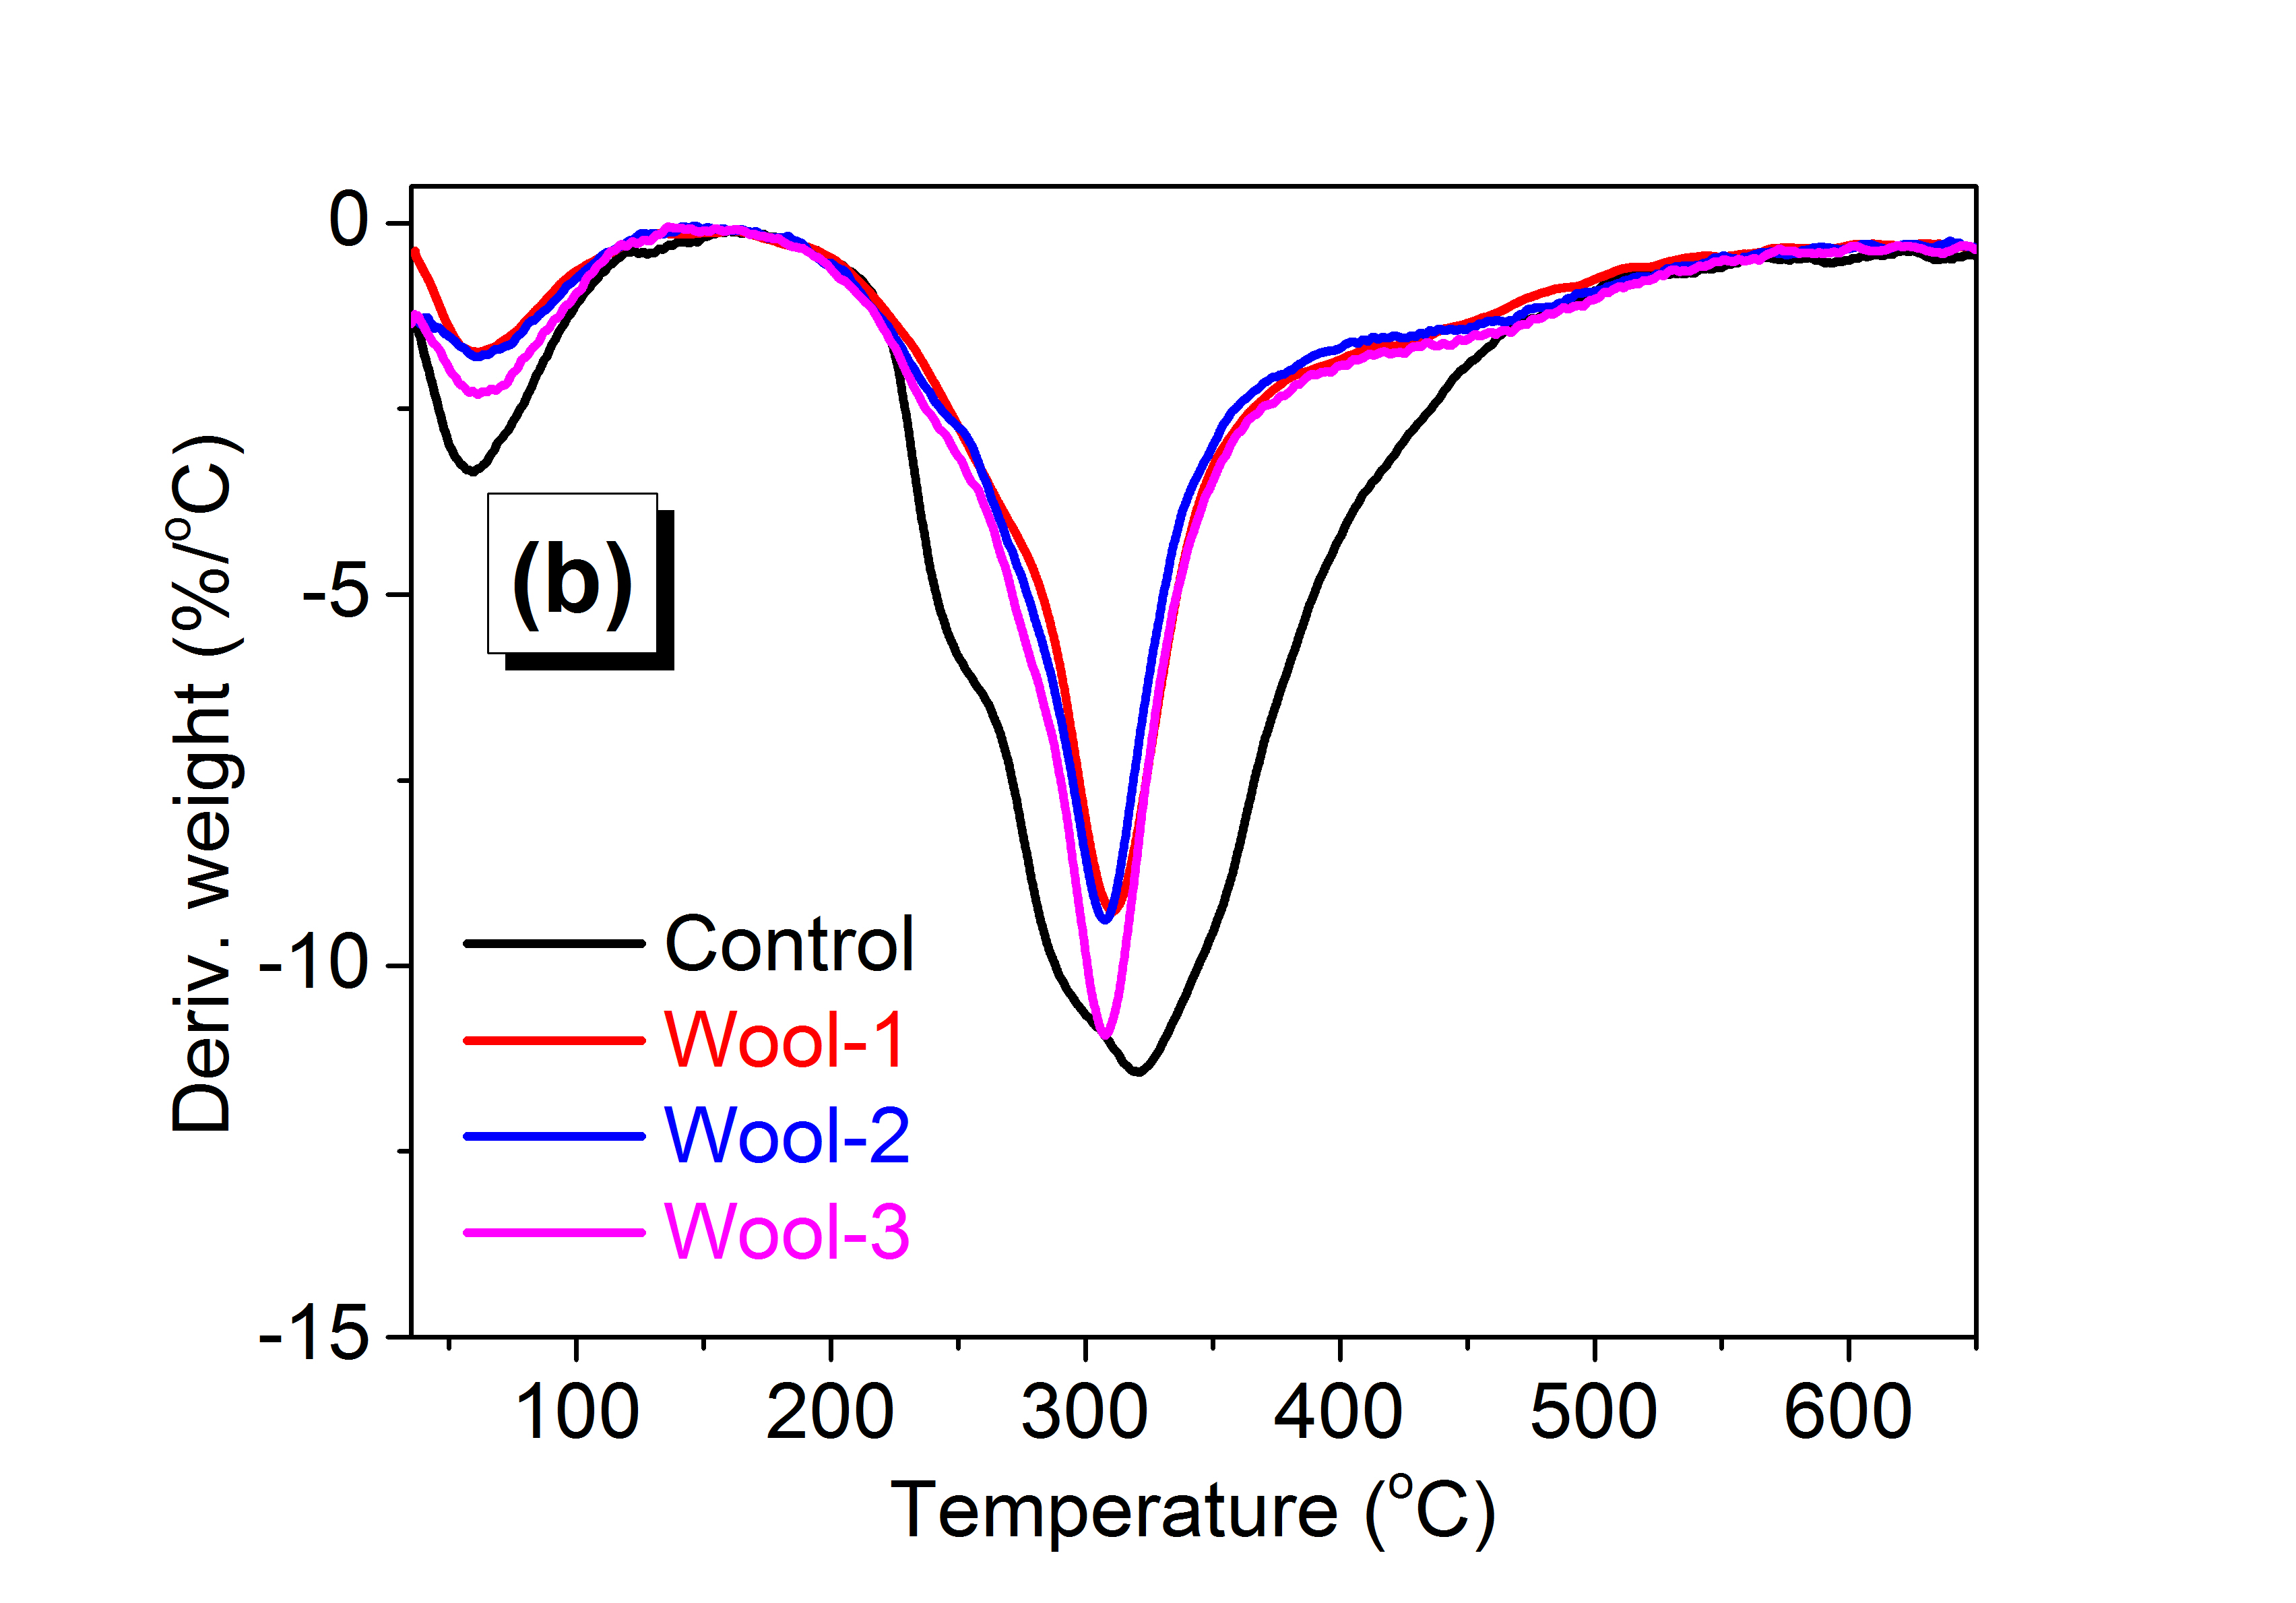


**Fig. S1** TG (a) and DTG (b) curves of the wool fabrics in nitrogen.
